# Supplementary material
Source: publisher site journal article supplement (https://cdn.jamanetwork.com/ama/content_public/journal/intemed/938894/ioi220006supp3_prod_1649946556.50132.pdf)
Supplement: Supplementary file 1 [file ioi220006supp3_prod_1649946556.50132.pdf]

\*Indicates required information. Only first name, last name, and suffix will appear in PubMed.

| <b>*Group Name(s): I-TECH Study Group</b> |                   |                              |                  |                                 |                                          |                                                         |                                                                                            |
|-------------------------------------------|-------------------|------------------------------|------------------|---------------------------------|------------------------------------------|---------------------------------------------------------|--------------------------------------------------------------------------------------------|
| <b>*First Name and Middle Initial(s)</b>  | <b>*Last Name</b> | <b>*Suffix (eg, Jr, III)</b> | Academic Degrees | Institution                     | Location (city, state/province, country) | Role or Contribution, eg, chair, principal investigator | Group (if more than 1 Group listed in the byline) and/or Subgroup (eg, Steering Committee) |
| Wen Yea                                   | Hwong             |                              | PhD              | Institute for Clinical Research | Kuala Lumpur                             | Statistician                                            |                                                                                            |
| Ee Vien                                   | Low               |                              | PhD              | National Institutes of Health   | Kuala Lumpur                             | Statistician                                            |                                                                                            |
| Mohan Dass                                | Pathmanathan      |                              | MD               | Institute for Clinical Research | Kuala Lumpur                             | ICR liaison, REDCap                                     |                                                                                            |
| Muhammad Luqman                           | Hamzah            |                              | MSc              | National Institutes of Health   | Kuala Lumpur                             | REDCap administration                                   |                                                                                            |
| Yew Chung                                 | Chan              |                              | MBBS             | Duchess of Kent Hospital        | Sabah                                    | Co-investigator                                         |                                                                                            |
| James Yau Hon                             | Voo               |                              | ClinPharm        | Duchess of Kent Hospital        | Sabah                                    | Co-investigator                                         |                                                                                            |
| Chun Fei                                  | Yap               |                              | MBBS             | Duchess of Kent Hospital        | Sabah                                    | Co-investigator                                         |                                                                                            |
| Yon Quan                                  | Chan              |                              | MRCP             | Duchess of Kent Hospital        | Sabah                                    | Co-investigator                                         |                                                                                            |
| Lee Kuen                                  | Vun               |                              | MD               | Duchess of Kent Hospital        | Sabah                                    | Co-investigator                                         |                                                                                            |
| Kent Kian Keong                           | Kong              |                              | Bpharm           | Duchess of Kent Hospital        | Sabah                                    | Study Coordinator                                       |                                                                                            |
| Yi Fang                                   | Lim               |                              | MD               | Kepala Batas Hospital           | Penang                                   | Study Coordinator                                       |                                                                                            |
| Yee Jie                                   | Teoh              |                              | Bpharm           | Kepala Batas Hospital           | Penang                                   | Pharmacist                                              |                                                                                            |
| Ammar Rashidi                             | Abdullah          |                              | MRCP             | Kepala Batas Hospital           | Penang                                   | Co-investigator                                         |                                                                                            |
| Anitha                                    | Ramadas           |                              | MClinPharm       | Kuala Lumpur Hospital           | Kuala Lumpur                             | Co-investigator                                         |                                                                                            |
| Chee Loon                                 | Leong             |                              | Mmed             | Kuala Lumpur Hospital           | Kuala Lumpur                             | Co-investigator                                         |                                                                                            |
| Noor Hidayu                               | Wahab             |                              | MD               | Kuala Lumpur Hospital           | Kuala Lumpur                             | Co-investigator                                         |                                                                                            |
| Nadiah                                    | Ismail            |                              | MD               | Kuala Lumpur Hospital           | Kuala Lumpur                             | Co-investigator                                         |                                                                                            |
| Ismaliza                                  | Ismail            |                              | Mmed             | Kuala Lumpur Hospital           | Kuala Lumpur                             | Co-investigator                                         |                                                                                            |
| Tung Meng                                 | Lee               |                              | MRCP             | Lahad Datu Hospital             | Sabah                                    | Co-investigator                                         |                                                                                            |
| Pei Jie                                   | Khoo              |                              | MRCP (Ireland)   | Lahad Datu Hospital             | Sabah                                    | Co-investigator                                         |                                                                                            |
| Sook Hui                                  | Phua              |                              | MClinPharm       | Lahad Datu Hospital             | Sabah                                    | Co-investigator                                         |                                                                                            |
| Prethivan Pillai                          | Gopalakrishnan    |                              | MRCP             | Lahad Datu Hospital             | Sabah                                    | Co-investigator                                         |                                                                                            |
| Sangeetha                                 | Jaya Selan        |                              | Bpharm (Hons)    | Lahad Datu Hospital             | Sabah                                    | Pharmacist                                              |                                                                                            |
| Iswaran                                   | Ampalakan         |                              | MD               | Lahad Datu Hospital             | Sabah                                    | Research Physician                                      |                                                                                            |
| Jen Fai                                   | Khuan             |                              | MD               | Lahad Datu Hospital             | Sabah                                    | Research Physician                                      |                                                                                            |
| Wan Nur Farra'Ain                         | Abdul Rashid      |                              | MBBS             | Lahad Datu Hospital             | Sabah                                    | Research Physician                                      |                                                                                            |

## Supplemental Online Content: Nonauthor Collaborators

\*Indicates required information. Only first name, last name, and suffix will appear in PubMed.

| *First Name and Middle Initial(s) | *Last Name    | *Suffix (eg, Jr, III) | Academic Degrees | Institution         | Location (city, state/province, country) | Role or Contribution, eg, chair, principal investigator | Group (if more than 1 Group listed in the byline) and/or Subgroup (eg, Steering Committee) |
|-----------------------------------|---------------|-----------------------|------------------|---------------------|------------------------------------------|---------------------------------------------------------|--------------------------------------------------------------------------------------------|
| Siti Sha'ada                      | Zakaria       |                       | MD               | Lahad Datu Hospital | Sabah                                    | Research Physician                                      |                                                                                            |
| Kalaiarasan                       | Gemini        |                       | MD               | Lahad Datu Hospital | Sabah                                    | Research Physician                                      |                                                                                            |
| Haslina                           | Burahan       |                       | MD               | Lahad Datu Hospital | Sabah                                    | Research Physician                                      |                                                                                            |
| Thaanveer Singh                   | Santokh Singh |                       | MBBS             | Lahad Datu Hospital | Sabah                                    | Research Physician                                      |                                                                                            |
| Noorfazlina                       | Jaafar        |                       | MD               | Lahad Datu Hospital | Sabah                                    | Research Physician                                      |                                                                                            |
| Nor Atikah                        | Mohd Shukri   |                       | MD               | Lahad Datu Hospital | Sabah                                    | Research Physician                                      |                                                                                            |
| Syaza                             | Izhar Hisham  |                       | MBBCh            | Lahad Datu Hospital | Sabah                                    | Research Physician                                      |                                                                                            |
| Sheng Hao                         | Teow          |                       | MD               | Lahad Datu Hospital | Sabah                                    | Research Physician                                      |                                                                                            |
| Chit Yeh                          | Lim           |                       | MBBS             | Lahad Datu Hospital | Sabah                                    | Research Physician                                      |                                                                                            |
| Shageetha                         | Rajantran     |                       | MD               | Lahad Datu Hospital | Sabah                                    | Research Physician                                      |                                                                                            |
| Siti Izzatul Annis                | Kamaruddin    |                       | MD               | Lahad Datu Hospital | Sabah                                    | Research Physician                                      |                                                                                            |
| Izarin Izmir                      | Izhar         |                       | MD               | Lahad Datu Hospital | Sabah                                    | Research Physician                                      |                                                                                            |
| Nur Syuhada                       | Mohd Mustapha |                       | MBBS             | Lahad Datu Hospital | Sabah                                    | Research Physician                                      |                                                                                            |
| Zulkefli                          | Mohamad       |                       | Bpharm (Hons)    | Lahad Datu Hospital | Sabah                                    | Pharmacist                                              |                                                                                            |
| Seri Rabiatul Nur                 | Abu Salim     |                       | BBiomed Science  | Melaka Hospital     | Melaka                                   | Co-investigator                                         |                                                                                            |
| Delarina Frimawati                | Othman Andu   |                       | MMedSci PH       | Melaka Hospital     | Melaka                                   | Co-investigator                                         |                                                                                            |
| Nurnadiah                         | Kamarudin     |                       | Mmed             | Melaka Hospital     | Melaka                                   | Co-investigator                                         |                                                                                            |
| Karamjit Kaur                     | Sarban Singh  |                       | MRCP             | Melaka Hospital     | Melaka                                   | Co-investigator                                         |                                                                                            |
| Eek Poei                          | Tay           |                       | MClinPharm       | Melaka Hospital     | Melaka                                   | Pharmacist                                              |                                                                                            |
| Siti Hir Huraizah                 | Md Tahir      |                       | PhD              | Melaka Hospital     | Melaka                                   | Pharmacist                                              |                                                                                            |
| Shalini                           | Vijayasingham |                       | MRCPS            | Melaka Hospital     | Melaka                                   | Co-investigator                                         |                                                                                            |
| Yik Zhi                           | Kum           |                       | MBBS             | Melaka Hospital     | Melaka                                   | Co-investigator                                         |                                                                                            |
| Peter Andrew                      | Natarajan     |                       | MBBChBAO         | Melaka Hospital     | Melaka                                   | Co-investigator                                         |                                                                                            |
| Yih Harn                          | Soh           |                       | MPH              | Melaka Hospital     | Melaka                                   | Research Physician                                      |                                                                                            |
| Syed Omar Farouk                  | Syed Alwi     |                       | MBBCh            | Melaka Hospital     | Melaka                                   | Research Physician                                      |                                                                                            |
| Hemaarubeni                       | Murugan       |                       | MD               | Melaka Hospital     | Melaka                                   | Co-investigator                                         |                                                                                            |
| Chuan Huan                        | Chuah         |                       | MRCP             | Penang Hospital     | Penang                                   | Co-Investigator                                         |                                                                                            |
| Shin Wuei                         | Tan           |                       | MRCP             | Penang Hospital     | Penang                                   | Co-Investigator                                         |                                                                                            |
| Kar Nim                           | Leong         |                       | MRCP             | Penang Hospital     | Penang                                   | Co-Investigator                                         |                                                                                            |

## Supplemental Online Content: Nonauthor Collaborators

\*Indicates required information. Only first name, last name, and suffix will appear in PubMed.

| *First Name and Middle Initial(s) | *Last Name     | *Suffix (eg, Jr, III) | Academic Degrees | Institution                                           | Location (city, state/province, country) | Role or Contribution, eg, chair, principal investigator | Group (if more than 1 Group listed in the byline) and/or Subgroup (eg, Steering Committee) |
|-----------------------------------|----------------|-----------------------|------------------|-------------------------------------------------------|------------------------------------------|---------------------------------------------------------|--------------------------------------------------------------------------------------------|
| Peng Shyan                        | Wong           |                       | MRCP             | Penang Hospital                                       | Penang                                   | Co-Investigator                                         |                                                                                            |
| Wendy Tyng Tyng                   | Chen           |                       | MRCP             | Penang Hospital                                       | Penang                                   | Co-Investigator                                         |                                                                                            |
| Ru Shing                          | Ng             |                       | MPharm           | Penang Hospital                                       | Penang                                   | Study Coordinator                                       |                                                                                            |
| Yen Li                            | Lim            |                       | Mpharm           | Penang Hospital                                       | Penang                                   | Study Coordinator                                       |                                                                                            |
| Farah Nadiyah                     | Bidin          |                       | MRCP             | Penang Hospital                                       | Penang                                   | Co-Investigator                                         |                                                                                            |
| Mann Leon                         | Chin           |                       | MRCP             | Penang Hospital                                       | Penang                                   | Co-Investigator                                         |                                                                                            |
| Han Lin                           | Guan           |                       | MRCP             | Penang Hospital                                       | Penang                                   | Co-Investigator                                         |                                                                                            |
| Mohd Hafiz                        | Mohamad Rasli  |                       | MBBS             | Putrajaya, Hospital                                   | Putrajaya                                | Co-Investigator                                         |                                                                                            |
| Rafidah                           | Abdullah       |                       | MRCP             | Putrajaya, Hospital                                   | Putrajaya                                | Co-Investigator                                         |                                                                                            |
| Mohd Akmal                        | Jamaludin      |                       | MBBChBAO         | Putrajaya, Hospital                                   | Putrajaya                                | Co-Investigator                                         |                                                                                            |
| Nabilah                           | Mohd Shohaime  |                       | Bpharm(Hons)     | Putrajaya, Hospital                                   | Putrajaya                                | Pharmacist                                              |                                                                                            |
| Syafiqah                          | Mohd Mansor    |                       | MBBS             | Putrajaya, Hospital                                   | Putrajaya                                | Co-Investigator                                         |                                                                                            |
| Ruhaizad                          | Rasliza        |                       | MD               | Putrajaya, Hospital                                   | Putrajaya                                | Co-Investigator                                         |                                                                                            |
| Lisa                              | Mohamed Nor    |                       | BMBS             | Putrajaya, Hospital                                   | Putrajaya                                | Study Coordinator                                       |                                                                                            |
| Kah Mean                          | Thong          |                       | MRCP             | Raja Permaisuri Bainun Hospital/Sungai Siput Hospital | Perak                                    | Co-Investigator                                         |                                                                                            |
| Balaurindiran                     | Muniandy       |                       | MRCP             | Raja Permaisuri Bainun Hospital/Sungai Siput Hospital | Perak                                    | Co-Investigator                                         |                                                                                            |
| Pamela Varn Teing                 | Saw            |                       | MRCP             | Raja Permaisuri Bainun Hospital/Sungai Siput Hospital | Perak                                    | Co-Investigator                                         |                                                                                            |
| Kah Shuen                         | Thong          |                       | MPharm           | Raja Permaisuri Bainun Hospital/Sungai Siput Hospital | Perak                                    | Co-Investigator                                         |                                                                                            |
| Kee Cheong                        | Wong           |                       | MRCP             | Raja Permaisuri Bainun Hospital/Sungai Siput Hospital | Perak                                    | Co-Investigator                                         |                                                                                            |
| V. Rubini Nair                    | Muthi          |                       | Mmed             | Raja Permaisuri Bainun Hospital/Sungai Siput Hospital | Perak                                    | Research Physician                                      |                                                                                            |
| Qhairyl Iyman                     | Ahmad Shanizza |                       | MRCP             | Raja Permaisuri Bainun Hospital/Sungai Siput Hospital | Perak                                    | Research Physician                                      |                                                                                            |
| Lavanya                           | Jeevaraj       |                       | MRCP             | Raja Permaisuri Bainun Hospital/Sungai Siput Hospital | Perak                                    | Research Physician                                      |                                                                                            |

## Supplemental Online Content: Nonauthor Collaborators

\*Indicates required information. Only first name, last name, and suffix will appear in PubMed.

| *First Name and Middle Initial(s) | *Last Name       | *Suffix (eg, Jr, III) | Academic Degrees | Institution                                           | Location (city, state/province, country) | Role or Contribution, eg, chair, principal investigator | Group (if more than 1 Group listed in the byline) and/or Subgroup (eg, Steering Committee) |
|-----------------------------------|------------------|-----------------------|------------------|-------------------------------------------------------|------------------------------------------|---------------------------------------------------------|--------------------------------------------------------------------------------------------|
| Ee Lin                            | Chew             |                       | MPharm           | Raja Permaisuri Bainun Hospital/Sungai Siput Hospital | Perak                                    | Pharmacist                                              |                                                                                            |
| Poh Ching                         | Huang            |                       | Bpharm(Hons)     | Raja Permaisuri Bainun Hospital/Sungai Siput Hospital | Perak                                    | Pharmacist                                              |                                                                                            |
| Jasmine                           | Retnasamy        |                       | MBBS             | Raja Permaisuri Bainun Hospital/Sungai Siput Hospital | Perak                                    | Co-Investigator                                         |                                                                                            |
| Philip Rajan                      | Devesahayam      |                       | MMED-ORLHNS      | Raja Permaisuri Bainun Hospital/Sungai Siput Hospital | Perak                                    | Co-Investigator                                         |                                                                                            |
| Mei San                           | Lim              |                       | MRCP             | Raja Permaisuri Bainun Hospital/Sungai Siput Hospital | Perak                                    | Co-Investigator                                         |                                                                                            |
| Thilagavathi Thanusia             | Viswanathan      |                       | MRCP             | Raja Permaisuri Bainun Hospital/Sungai Siput Hospital | Perak                                    | Co-Investigator                                         |                                                                                            |
| Muhammad Syafiq                   | Mahamad Azazis   |                       | MBBS             | Raja Permaisuri Bainun Hospital/Sungai Siput Hospital | Perak                                    | Research Physician                                      |                                                                                            |
| Gregory                           | Domnic           |                       | MSc              | Raja Permaisuri Bainun Hospital/Sungai Siput Hospital | Perak                                    | Study Coordinator                                       |                                                                                            |
| Muhammad Fursanallah              | Tengku           |                       | MD               | Raja Permaisuri Bainun Hospital/Sungai Siput Hospital | Perak                                    | Research Physician                                      |                                                                                            |
| Jeanette Qiu Yi                   | Wong             |                       | MBBchBAO         | Raja Permaisuri Bainun Hospital/Sungai Siput Hospital | Perak                                    | Research Physician                                      |                                                                                            |
| Xin Hui                           | Choo             |                       | MBBS             | Raja Permaisuri Bainun Hospital/Sungai Siput Hospital | Perak                                    | Research Physician                                      |                                                                                            |
| Ambika Nair                       | Prabhakaran      |                       | MBBchBAO         | Raja Permaisuri Bainun Hospital/Sungai Siput Hospital | Perak                                    | Research Physician                                      |                                                                                            |
| Nur Shakirah                      | Zaharudin        |                       | MBBS             | Raja Permaisuri Bainun Hospital/Sungai Siput Hospital | Perak                                    | Research Physician                                      |                                                                                            |
| Asma Usa'diyah                    | Abu Bakar Sayuti |                       | MBBS             | Raja Permaisuri Bainun Hospital/Sungai Siput Hospital | Perak                                    | Research Physician                                      |                                                                                            |
| Nabilah                           | Abdul Wahid      |                       | MD               | Raja Permaisuri Bainun Hospital/Sungai Siput Hospital | Perak                                    | Research Physician                                      |                                                                                            |
| Nurul Hasanah                     | Saat             |                       | MBBS             | Raja Permaisuri Bainun Hospital/Sungai Siput Hospital | Perak                                    | Research Physician                                      |                                                                                            |
| Nurul Huda                        | Othman           |                       | MBBS             | Raja Permaisuri Bainun Hospital/Sungai Siput Hospital | Perak                                    | Research Physician                                      |                                                                                            |

## Supplemental Online Content: Nonauthor Collaborators

\*Indicates required information. Only first name, last name, and suffix will appear in PubMed.

| *First Name and Middle Initial(s) | *Last Name      | *Suffix (eg, Jr, III) | Academic Degrees | Institution                                           | Location (city, state/province, country) | Role or Contribution, eg, chair, principal investigator | Group (if more than 1 Group listed in the byline) and/or Subgroup (eg, Steering Committee) |
|-----------------------------------|-----------------|-----------------------|------------------|-------------------------------------------------------|------------------------------------------|---------------------------------------------------------|--------------------------------------------------------------------------------------------|
| Aisyah                            | Ahmad Zubaidi   |                       | MBBS             | Raja Permaisuri Bainun Hospital/Sungai Siput Hospital | Perak                                    | Research Physician                                      |                                                                                            |
| Nurul Miza Shasheha               | Abdul Mutalib   |                       | MBBCH            | Raja Permaisuri Bainun Hospital/Sungai Siput Hospital | Perak                                    | Research Physician                                      |                                                                                            |
| Viknesh Dev                       | Lekh Raj Sharma |                       | MBBS             | Raja Permaisuri Bainun Hospital/Sungai Siput Hospital | Perak                                    | Research Physician                                      |                                                                                            |
| Daleni                            | Gunaraj         |                       | MBBchBAO         | Raja Permaisuri Bainun Hospital/Sungai Siput Hospital | Perak                                    | Research Physician                                      |                                                                                            |
| Muhammad Na'imuddin'alim          | Hanafi          |                       | MD               | Raja Permaisuri Bainun Hospital/Sungai Siput Hospital | Perak                                    | Research Physician                                      |                                                                                            |
| Nurul Atiqah                      | Embok Ungah     |                       | MD               | Raja Permaisuri Bainun Hospital/Sungai Siput Hospital | Perak                                    | Research Physician                                      |                                                                                            |
| Muhammad Ariffadilah              | Mohd Zahari     |                       | MD               | Raja Permaisuri Bainun Hospital/Sungai Siput Hospital | Perak                                    | Research Physician                                      |                                                                                            |
| Chun Lian                         | Chaw            |                       | MBBS             | Raja Permaisuri Bainun Hospital/Sungai Siput Hospital | Perak                                    | Research Physician                                      |                                                                                            |
| Jennifer                          | Arokisamy       |                       | MBBS             | Raja Permaisuri Bainun Hospital/Sungai Siput Hospital | Perak                                    | Research Physician                                      |                                                                                            |
| Puteri Amira                      | Mohd Hassan     |                       | MD               | Raja Permaisuri Bainun Hospital/Sungai Siput Hospital | Perak                                    | Research Physician                                      |                                                                                            |
| Ainun Jariah                      | Ayub            |                       | MBBS             | Raja Permaisuri Bainun Hospital/Sungai Siput Hospital | Perak                                    | Research Physician                                      |                                                                                            |
| Azrin Nurfarahin                  | Zainal Abidin   |                       | MD               | Raja Permaisuri Bainun Hospital/Sungai Siput Hospital | Perak                                    | Research Physician                                      |                                                                                            |
| Khai Sin                          | Choong          |                       | BPharm(Hons)     | Raja Permaisuri Bainun Hospital/Sungai Siput Hospital | Perak                                    | Pharmacist                                              |                                                                                            |
| Lee Rhui                          | Teoh            |                       | BPharm(Hons)     | Raja Permaisuri Bainun Hospital/Sungai Siput Hospital | Perak                                    | Pharmacist                                              |                                                                                            |
| Huan Yean                         | Kang            |                       | MRCP             | Sultan Abdul Halim Hospital                           | Kedah                                    | Co-Investigator                                         |                                                                                            |
| Kesavathy                         | Krishnan        |                       | MBBS             | Sultan Abdul Halim Hospital                           | Kedah                                    | Co-Investigator                                         |                                                                                            |
| Peacchaima                        | Purusothman     |                       | MRCP             | Sultan Abdul Halim Hospital                           | Kedah                                    | Co-Investigator                                         |                                                                                            |
| Mohamad Izwan                     | Zainol          |                       | MD               | Sultan Abdul Halim Hospital                           | Kedah                                    | Co-Investigator                                         |                                                                                            |
| Mei Mei                           | Tew             |                       | Bpharm(Hons)     | Sultan Abdul Halim Hospital                           | Kedah                                    | Co-Investigator                                         |                                                                                            |

## Supplemental Online Content: Nonauthor Collaborators

\*Indicates required information. Only first name, last name, and suffix will appear in PubMed.

| *First Name and Middle Initial(s) | *Last Name       | *Suffix (eg, Jr, III) | Academic Degrees   | Institution                             | Location (city, state/province, country) | Role or Contribution, eg, chair, principal investigator | Group (if more than 1 Group listed in the byline) and/or Subgroup (eg, Steering Committee) |
|-----------------------------------|------------------|-----------------------|--------------------|-----------------------------------------|------------------------------------------|---------------------------------------------------------|--------------------------------------------------------------------------------------------|
| Mohd Fyzal                        | Bahrudin         |                       | Mmed               | Sultan Abdul Halim Hospital             | Kedah                                    | Co-Investigator                                         |                                                                                            |
| Kah Chuan                         | Lim              |                       | MRCP               | Sungai Buloh Hospital                   | Selangor                                 | Co-Investigator                                         |                                                                                            |
| Sharmila                          | Mohd Nadzir      |                       | MRCP               | Sungai Buloh Hospital                   | Selangor                                 | Co-Investigator                                         |                                                                                            |
| Lavanya                           | Narayanan        |                       | MRCP               | Sungai Buloh Hospital                   | Selangor                                 | Co-Investigator                                         |                                                                                            |
| Amira Naziffa                     | Shamsuddin       |                       | MBBS               | Sungai Buloh Hospital                   | Selangor                                 | Co-Investigator                                         |                                                                                            |
| Kok Tong                          | Tan              |                       | MMed               | Sungai Buloh Hospital                   | Selangor                                 | Co-Investigator                                         |                                                                                            |
| Shaharudeen                       | Kamaludeen       |                       | MMed               | Sungai Buloh Hospital                   | Selangor                                 | Co-Investigator                                         |                                                                                            |
| Nur Munirah                       | Ibrahim          |                       | MRCP               | Sungai Buloh Hospital                   | Selangor                                 | Co-Investigator                                         |                                                                                            |
| Pearly Kim Aik                    | Sim              |                       | MRCP               | Sungai Buloh Hospital                   | Selangor                                 | Co-Investigator                                         |                                                                                            |
| Irdina                            | Aminuddi         |                       | MBBS               | Sungai Buloh Hospital                   | Selangor                                 | Research Medical Officer                                |                                                                                            |
| Raja Nurulain                     | Raja Nahar Putra |                       | MD                 | Sungai Buloh Hospital                   | Selangor                                 | Research Medical Officer                                |                                                                                            |
| Lin Ye                            | Yah              |                       | Bpharm             | Sungai Buloh Hospital                   | Selangor                                 | Pharmacist                                              |                                                                                            |
| Boon Seng                         | Liew             |                       | MS<br>Neurosurgery | Sungai Buloh Hospital                   | Selangor                                 | Co-Investigator                                         |                                                                                            |
| Tharmini                          | Ravi             |                       | MD                 | Sungai Buloh Hospital                   | Selangor                                 | Study Coordinator                                       |                                                                                            |
| Syarifah Nurul Ain                | Syed Badaruddin  |                       | MBBS               | Sungai Buloh Hospital                   | Selangor                                 | Monitor                                                 |                                                                                            |
| Nur Suriana                       | Mah Hassan       |                       | BSc                | Sungai Buloh Hospital                   | Selangor                                 | Research Assistant                                      |                                                                                            |
| Zulaiika                          | Roslan           |                       | MSc                | Sungai Buloh Hospital                   | Selangor                                 | Research Assistant                                      |                                                                                            |
| Reshaini                          | Nadarajan        |                       | MBBS               | Sungai Buloh Hospital                   | Selangor                                 | Research Medical Officer                                |                                                                                            |
| Jian-Gang                         | Ang              |                       | MRCP               | Taiping Hospital/Kuala Kangsar Hospital | Perak                                    | Co-Investigator                                         |                                                                                            |
| Minalosani                        | Arumugam         |                       | MRCP               | Taiping Hospital/Kuala Kangsar Hospital | Perak                                    | Co-Investigator                                         |                                                                                            |
| Kin Wei                           | Chua             |                       | MScMed             | Taiping Hospital/Kuala Kangsar Hospital | Perak                                    | Pharmacist/Study Coordinator                            |                                                                                            |
| Calvin Gim Seong                  | Ooi              |                       | MRCP               | Taiping Hospital/Kuala Kangsar Hospital | Perak                                    | Co-Investigator                                         |                                                                                            |
| Siew Huang                        | Lee              |                       | MClinPharm         | Taiping Hospital/Kuala Kangsar Hospital | Perak                                    | Pharmacist                                              |                                                                                            |
| Way Ti                            | Ooi              |                       | MD                 | Taiping Hospital/Kuala Kangsar Hospital | Perak                                    | Study Coordinator                                       |                                                                                            |

## Supplemental Online Content: Nonauthor Collaborators

\*Indicates required information. Only first name, last name, and suffix will appear in PubMed.

| *First Name and Middle Initial(s) | *Last Name      | *Suffix (eg, Jr, III) | Academic Degrees | Institution                             | Location (city, state/province, country) | Role or Contribution, eg, chair, principal investigator | Group (if more than 1 Group listed in the byline) and/or Subgroup (eg, Steering Committee) |
|-----------------------------------|-----------------|-----------------------|------------------|-----------------------------------------|------------------------------------------|---------------------------------------------------------|--------------------------------------------------------------------------------------------|
| Xing Yi                           | Tang            |                       | MBBS             | Taiping Hospital/Kuala Kangsar Hospital | Perak                                    | Study Coordinator                                       |                                                                                            |
| Kunaraj                           | Perumalu        |                       | MRCP             | Taiping Hospital/Kuala Kangsar Hospital | Perak                                    | Study Coordinator                                       |                                                                                            |
| Muhammad Hazazi                   | Razali          |                       | MBBS             | Taiping Hospital/Kuala Kangsar Hospital | Perak                                    | Study Coordinator                                       |                                                                                            |
| Mohamad Shamirul Afiq             | Murat           |                       | MBBS             | Taiping Hospital/Kuala Kangsar Hospital | Perak                                    | Study Coordinator                                       |                                                                                            |
| Nor Syahirah                      | Hamdan          |                       | Bpharm           | Taiping Hospital/Kuala Kangsar Hospital | Perak                                    | Pharmacist                                              |                                                                                            |
| Muhammad Syafiq                   | Hamidi          |                       | MD               | Taiping Hospital/Kuala Kangsar Hospital | Perak                                    | Study Coordinator                                       |                                                                                            |
| Amalina                           | Anuar           |                       | MBBS             | Tuanku Fauziah Hospital                 | Perlis                                   | Co-Investigator                                         |                                                                                            |
| Wei Chern                         | Ang             |                       | MPharm (Hons.)   | Tuanku Fauziah Hospital                 | Perlis                                   | Co-Investigator                                         |                                                                                            |
| Chee Kong                         | Wong            |                       | DrIntMed         | Tuanku Fauziah Hospital                 | Perlis                                   | Co-Investigator                                         |                                                                                            |
| Irma Liyana                       | Mushaddik       |                       | MBBS             | Tuanku Fauziah Hospital                 | Perlis                                   | Co-Investigator                                         |                                                                                            |
| Shafarul Halimi                   | Mohamed         |                       | MMed             | Tuanku Fauziah Hospital                 | Perlis                                   | Co-Investigator                                         |                                                                                            |
| Raja Ahmad Reza                   | Raja Lope Ahmad |                       | MRCP             | Tumpat Hospital                         | Kelantan                                 | Co-Investigator                                         |                                                                                            |
| Wan Mohd Khairul                  | Wan Zainudin    |                       | Mmed             | Tumpat Hospital                         | Kelantan                                 | Co-Investigator                                         |                                                                                            |
| Ahmad Fikhri                      | Mohd Zin        |                       | Bpharm(HONS)     | Tumpat Hospital                         | Kelantan                                 | Study Coordinator                                       |                                                                                            |
| Sze Kye                           | Teoh            |                       | MRCP             | Tumpat Hospital                         | Kelantan                                 | Co-Investigator                                         |                                                                                            |
| Mohd Yusran                       | Yusoff          |                       | MBChB            | Tumpat Hospital                         | Kelantan                                 | Co-Investigator                                         |                                                                                            |
| Siti Norizan                      | Abdul Rani      |                       | Bpharm           | Tumpat Hospital                         | Kelantan                                 | Co-Investigator                                         |                                                                                            |
| Mazilah                           | Ab Rahman       |                       | Post Basic AEMTC | Tumpat Hospital                         | Kelantan                                 | Study Coordinator                                       |                                                                                            |
| Maizatul Akmal                    | Mohd Noor       |                       | BPharm(Hons)     | Tumpat Hospital                         | Kelantan                                 | Study Coordinator                                       |                                                                                            |
| Tuan Norhafiza                    | Tuan Mat        |                       | S.Farm           | Tumpat Hospital                         | Kelantan                                 | Study Coordinator                                       |                                                                                            |
| Mohd Khairi                       | Othman          |                       | Mmed             | Tumpat Hospital                         | Kelantan                                 | Co-Investigator                                         |                                                                                            |

## Supplemental Online Content: Nonauthor Collaborators

\*Indicates required information. Only first name, last name, and suffix will appear in PubMed.

| *First Name and Middle Initial(s) | *Last Name             | *Suffix (eg, Jr, III) | Academic Degrees | Institution                      | Location (city, state/province, country) | Role or Contribution, eg, chair, principal investigator | Group (if more than 1 Group listed in the byline) and/or Subgroup (eg, Steering Committee) |
|-----------------------------------|------------------------|-----------------------|------------------|----------------------------------|------------------------------------------|---------------------------------------------------------|--------------------------------------------------------------------------------------------|
| Mohammad                          | Sayed Sahul Hamid Gani |                       | Mmed             | Tumpat Hospital                  | Kelantan                                 | Co-Investigator                                         |                                                                                            |
| Ching Zin                         | Ngua                   |                       | BPharm(Hons)     | Sarawak General Hospital         | Sarawak                                  | Co-Investigator                                         |                                                                                            |
| Andrew Kean Wei                   | Chang                  |                       | MRCP             | Sarawak General Hospital         | Sarawak                                  | Co-Investigator                                         |                                                                                            |
| Zhun Han                          | Wong                   |                       | MRCP             | Sarawak General Hospital         | Sarawak                                  | Co-Investigator                                         |                                                                                            |
| Andy Tze Yang                     | Ko                     |                       | MRCP             | Sarawak General Hospital         | Sarawak                                  | Co-Investigator                                         |                                                                                            |
| Su Fui                            | Thung                  |                       | Mmed             | Sarawak General Hospital         | Sarawak                                  | Co-Investigator                                         |                                                                                            |
| Xun Ting                          | Tiong                  |                       | MD               | Sarawak General Hospital         | Sarawak                                  | Co-Investigator                                         |                                                                                            |
| Hock Hin                          | Chua                   |                       | MRCP             | Sarawak General Hospital         | Sarawak                                  | Co-Investigator                                         |                                                                                            |
| Kiam Seong                        | Goh                    |                       | MD               | MAEPS Low Risk Quarantine Centre | Selangor                                 | Co-investigator                                         |                                                                                            |
| Shanthini                         | Muthusamy              |                       | MMed             | MAEPS Low Risk Quarantine Centre | Selangor                                 | Co-investigator                                         |                                                                                            |
| Wai Yang                          | Loo                    |                       | MMed             | MAEPS Low Risk Quarantine Centre | Selangor                                 | Co-investigator                                         |                                                                                            |
| Thamarai                          | Supramaniam            |                       | MMed             | MAEPS Low Risk Quarantine Centre | Selangor                                 | Co-investigator                                         |                                                                                            |
| Rakesh                            | Lingam                 |                       | MBBS             | MAEPS Low Risk Quarantine Centre | Selangor                                 | Co-investigator                                         |                                                                                            |
| Logadharshini                     | Chandra Kumar          |                       | MRCP             | MAEPS Low Risk Quarantine Centre | Selangor                                 | Co-investigator                                         |                                                                                            |
| Siew Theng                        | Chun                   |                       | BPharm           | MAEPS Low Risk Quarantine Centre | Selangor                                 | Study Pharmacist                                        |                                                                                            |
| Dariel                            | R Selvarajah           |                       | MD               | MAEPS Low Risk Quarantine Centre | Selangor                                 | Research Medical Officer                                |                                                                                            |
| Darshinee                         | Mohan Raja             |                       | MBBS             | MAEPS Low Risk Quarantine Centre | Selangor                                 | Research Medical Officer                                |                                                                                            |
| One Ling                          | Low                    |                       | BPharm           | MAEPS Low Risk Quarantine Centre | Selangor                                 | Study Pharmacist                                        |                                                                                            |
| Prathiv                           | Supparmaniam           |                       | MBBS             | MAEPS Low Risk Quarantine Centre | Selangor                                 | Research Medical Officer                                |                                                                                            |



## Supplemental Online Content: Nonauthor Collaborators

\*Indicates required information. Only first name, last name, and suffix will appear in PubMed.

| *First Name and Middle Initial(s) | *Last Name | *Suffix (eg, Jr, III) | Academic Degrees        | Institution                              | Location (city, state/province, country) | Role or Contribution, eg, chair, principal investigator | Group (if more than 1 Group listed in the byline) and/or Subgroup (eg, Steering Committee) |
|-----------------------------------|------------|-----------------------|-------------------------|------------------------------------------|------------------------------------------|---------------------------------------------------------|--------------------------------------------------------------------------------------------|
| Husna                             | Ad Suhadak |                       | BPharm                  | MAEPS Low Risk Quarantine Centre         | Selangor                                 | Study Pharmacist                                        |                                                                                            |
| Boon Cong                         | Beh        |                       | MMed                    | MEAPS/Hospital Raja Permaisuri Bainun    | Selangor/Perak                           | Co-investigator                                         |                                                                                            |
| Yi Lin                            | Lee        |                       | Mpharm                  | Centre for Clinical Trial/MAEPS          | Kuala Lumpur/Selangor                    | Co-Investigator                                         |                                                                                            |
| Cheng Lee                         | Ooi        |                       | MBBS                    | Centre For Clinical Trial/MAEPS          | Kuala Lumpur/Selangor                    | Co-Investigator                                         |                                                                                            |
| Khairul Nisa'                     | Ishak      |                       | BBMedSc                 | Institute for Clinical Research/MAEPS    | Kuala Lumpur/Selangor                    | Study Coordinator                                       |                                                                                            |
| Rozila                            | Harun      |                       | BNS                     | Institute for Clinical Research/MAEPS    | Kuala Lumpur/Selangor                    | Co-Investigator                                         |                                                                                            |
| Soon Leng                         | Lee        |                       | MRCP                    | Sultanah Aminah Hospital/Permai Hospital | Johor                                    | Co-Investigator                                         |                                                                                            |
| Kok Soon                          | Lee        |                       | MRCP                    | Sultanah Aminah Hospital/Permai Hospital | Johor                                    | Co-Investigator                                         |                                                                                            |
| Ji Ken                            | Ow         |                       | MRCP                    | Sultanah Aminah Hospital/Permai Hospital | Johor                                    | Co-Investigator                                         |                                                                                            |
| Neerusha                          | Kaisbain   |                       | MRCP                    | Sultanah Aminah Hospital/Permai Hospital | Johor                                    | Co-Investigator                                         |                                                                                            |
| Caryn Jia Wern                    | Leong      |                       | MD                      | Sultanah Aminah Hospital/Permai Hospital | Johor                                    | Monitor (Administrative)                                |                                                                                            |
| Yun Lee                           | Chee       |                       | Bpharm                  | Sultanah Aminah Hospital/Permai Hospital | Johor                                    | Pharmacist                                              |                                                                                            |
| Keng Long                         | Teh        |                       | Bpharm                  | Sultanah Aminah Hospital/Permai Hospital | Johor                                    | Pharmacist                                              |                                                                                            |
| Kam Veng                          | Chan       |                       | MRCP                    | Sultanah Bahiyah, Hospital               | Kedah                                    | Co-Investigator                                         |                                                                                            |
| Kee Tat                           | Lee        |                       | MRCP                    | Sultanah Bahiyah, Hospital               | Kedah                                    | Co-Investigator                                         |                                                                                            |
| E Jinq                            | Wong       |                       | M.Pharm                 | Sultanah Bahiyah, Hospital               | Kedah                                    | Co-Investigator                                         |                                                                                            |
| Ibtisam                           | Ismail     |                       | Bach.of Health Sciences | Sultanah Bahiyah, Hospital               | Kedah                                    | Co-Investigator                                         |                                                                                            |
| Mohd Azri                         | Mohd Suan  |                       | MSc.                    | Sultanah Bahiyah, Hospital               | Kedah                                    | Co-Investigator                                         |                                                                                            |

Supplemental Online Content: Nonauthor Collaborators

\*Indicates required information. Only first name, last name, and suffix will appear in PubMed.

| <b>*First Name and Middle Initial(s)</b> | <b>*Last Name</b>       | <b>*Suffix (eg, Jr, III)</b> | Academic Degrees | Institution                   | Location (city, state/province, country) | Role or Contribution, eg, chair, principal investigator | Group (if more than 1 Group listed in the byline) and/or Subgroup (eg, Steering Committee) |
|------------------------------------------|-------------------------|------------------------------|------------------|-------------------------------|------------------------------------------|---------------------------------------------------------|--------------------------------------------------------------------------------------------|
| Ahmad Lutfi                              | Mohamed Yusoff          |                              | MB BCh BAO       | Sultanah Nur Zahirah Hospital | Terengganu                               | Co-Investigator                                         |                                                                                            |
| Tuan Muhd Fairuz                         | Tuan Ismail @Tuan Manah |                              | Mmed             | Sultanah Nur Zahirah Hospital | Terengganu                               | Co-Investigator                                         |                                                                                            |
| Khairul Azmi                             | Ibrahim                 |                              | MMed             | Sultanah Nur Zahirah Hospital | Terengganu                               | Co-Investigator                                         |                                                                                            |
| Hazfadzila                               | Mohd Unit               |                              | MRCP             | Sultanah Nur Zahirah Hospital | Terengganu                               | Co-Investigator                                         |                                                                                            |
| Norsima Nazifah                          | Sidek                   |                              | Bpharm           | Sultanah Nur Zahirah Hospital | Terengganu                               | Co-Investigator                                         |                                                                                            |
| Noraini                                  | Seman                   |                              | Dip in Nursing   | Sultanah Nur Zahirah Hospital | Terengganu                               | Co-Investigator                                         |                                                                                            |
